# Supplementary material for: Organizational innovation: verifying a comprehensive model for catalyzing organizational development and change
Source: Springer Nature journal article supplement (doi:10.1186/s40604-015-0026-1), 2015-10-12
Supplement: MOESM1 [file 11901870]

# Organizational Innovation: Verifying a Comprehensive Model for Catalyzing Organizational Development and Change

Annika Steiber and Sverker Alänge

الابتكارات التنظيمية : التحقق من نموذج شامل للتحفيز على التنمية التنظيمية والتغيير  
الكاتب (ة) : Annika Steiber و Sverker Alänge

ملخص

يجب على المنظمات ان تستخدم بنجاحه الابتكارات التنظيمية حتى تتمكن من الحفاظ على قدرتها التنافسية في عصر العولمة والذي يتميز بسرعة التحولات . ابرزت الابحاث السابقة الحاجة إلى إطار شامل لفهم أفضل للآليات التي تشجع على الابتكارات التنظيمية . قدم steiber و alänge (2015) نموذج شامل للابتكارات التنظيمية بالاعتماد على الابحاث التي اجريت في هذا المجال وعلى دراستين تجريبيتين حول إدارة الجودة الشاملة للابتكارات التنظيمية ، الانتاج النحيف و نظام إنتاج تويوتا. تعتمد هذه الابحاث اساسا على تجارب تويوتا في اليابان والتي عرقة بتركيزها على التحسين المستمر للجودة و النجاعة . تبحث هذه الورقة إمكانية تطبيق هذا النموذج على مختلف فئات الابتكارات التنظيمية في مختلف البيئات المؤسسية. ولذلك ثم اختبار نظام الابتكار لجوجل "نظام المعلومات الجغرافية" ، والمصمم في وادي السيليكون بولاية كاليفورنيا والذي يعتبر كابتكار تنظيمي يعتمد على الابتكار المستمر. ينبغي أن يمكننا هذا النموذج من تحليل "نظام الابتكار لجوجل"، باعتباره ابتكارا تنظيميا. تهدف هذه الورقة اذا الى التحقق من نموذج شامل لإنشاء وتوزيع ودعم الابتكارات التنظيمية. تمكن النتائج من تعميم النظرية الحالية على الابتكارات التنظيمية وتقديم نظرة عامة للعاملين في البيئات التي تتميز بكثافة الابتكارات.
